# Supplementary material for: Dosimetric Comparison of Proton Versus Photon Radiosurgery for Treatment of Pituitary Adenoma
Source: PubMed Central journal article supplement — Adv Radiat Oncol. 2021 Sep 17;6(6):100806. doi: 10.1016/j.adro.2021.100806 (PMC8655425; doi:10.1016/j.adro.2021.100806), 2021-09-17
Supplement: mmc1.pdf [file mmc1.pdf]

Supplementary Table 1: Estimated Uniform Dose in Gy(RBE) to organs at risk

| Organ at Risk      | PSRS | 5XSRS | 2.5XSRS | PSRS vs<br>5XSRS<br>p-value | PSRS vs<br>2.5XSRS<br>p-value | 5XSRS vs<br>2.5XSRS<br>p-value |
|--------------------|------|-------|---------|-----------------------------|-------------------------------|--------------------------------|
| Right ocular globe | 0.00 | 0.10  | 0.09    | 0.012*                      | 0.012*                        | 0.12                           |
| Left ocular globe  | 0.08 | 0.14  | 0.11    | 0.19                        | 0.15                          | 0.058                          |
| Right optic nerve  | 3.35 | 4.08  | 4.20    | 0.021*                      | 0.021*                        | 0.44                           |
| Left optic nerve   | 4.04 | 4.56  | 4.47    | 0.051                       | 0.086                         | 0.51                           |
| Optic chiasm       | 4.23 | 5.06  | 4.85    | 0.086                       | 0.11                          | 0.44                           |
| Temporal lobes     | 7.80 | 7.39  | 7.29    | 0.21                        | 0.17                          | 0.86                           |
| Hypothalamus       | 0.94 | 2.47  | 2.39    | 0.011*                      | 0.0077*                       | 0.86                           |
| Brainstem          | 4.86 | 5.13  | 4.94    | 0.44                        | 0.44                          | 0.68                           |
| Right cochlea      | 0.00 | 1.69  | 1.64    | 0.0077*                     | 0.0077*                       | 0.77                           |
| Left cochlea       | 0.09 | 1.38  | 1.30    | 0.0077*                     | 0.0077*                       | 0.44                           |

Abbreviations

PSRS = Proton stereotactic radiosurgery;

2.5XSRS, 5XSRS = volumetric-modulated arc therapy SRS using 2.5mm and 5mm multileaf collimators, respectively;

\*p-value  $\leq$  0.05 considered significant

Supplementary Table 2: Numerical values for estimated incidence of secondary tumors for all 9 cases according to stereotactic radiosurgery treatment modality expressed as cases of secondary tumors per 10,000 patient-years. Abbreviations: PSRS = Proton stereotactic radiosurgery; 2.5XSRS, 5XSRS = volumetric-modulated arc therapy SRS using 2.5mm and 5mm multileaf collimators, respectively;

\*p-value  $\leq 0.05$  considered significant

| Cases per 10,000 patient-years | Case | PSRS | 5XSRS | 2.5XSRS |
|--------------------------------|------|------|-------|---------|
|                                | 1    | 3.39 | 8.39  | 8.46    |
|                                | 2    | 5.32 | 15.04 | 15.48   |
|                                | 3    | 6.97 | 17.26 | 16.42   |
|                                | 4    | 6.58 | 13.38 | 12.42   |
|                                | 5    | 4.77 | 8.68  | 10.18   |
|                                | 6    | 5.83 | 10.68 | 11.69   |
|                                | 7    | 4.45 | 14.05 | 11.57   |
|                                | 8    | 5.94 | 15.60 | 14.31   |
|                                | 9    | 4.27 | 13.27 | 13.41   |

p=.008      p=.77

p=.008
